1 Development and Characterization of a Weaned Pig Model of Shiga Toxin–Producing *E. coli*-  
2 Induced Gastrointestinal Disease

3  
4 Justin X. Boeckman<sup>1¶</sup>, Sarah Sprayberry<sup>1¶</sup>, Abby Korn<sup>1</sup>, Jan S. Suchodolski<sup>2</sup>, Chad Paulk<sup>1,3</sup>,  
5 Kenneth Genovese<sup>4</sup>, Raquel R. Rech<sup>5</sup>, Paula R. Giaretta<sup>5,6</sup>, Anna Blick<sup>5</sup>, Todd Callaway<sup>4,8</sup>,  
6 Jason J. Gill<sup>1,9#</sup>

7  
8 **Affiliations**

9 <sup>1</sup>Department of Animal Science, Texas A&M University, College Station, TX USA.

10  
11 <sup>2</sup>Department of Small Animal Clinical Sciences, Gastrointestinal Laboratory, College of  
12 Veterinary Medicine & Biomedical Sciences, Texas A&M University, College Station, TX,  
13 USA.

14  
15 <sup>3</sup>Current affiliation: Department of Grain Science and Industry, College of Agriculture,  
16 Kansas State University, Manhattan, KS, USA

17  
18 <sup>4</sup>USDA-ARS, Food and Feed Safety Research Unit, College Station, TX USA

19  
20 <sup>5</sup>Department of Veterinary Pathobiology, College of Veterinary Medicine and Biomedical  
21 Sciences, Texas A&M University, College Station, Texas, USA

22  
23 <sup>6</sup>School of Veterinary Medicine, Universidade Federal de Minas Gerais, Belo Horizonte,  
24 Brazil

25  
26 <sup>8</sup>Current affiliation: Department of Animal and Dairy Science, University of Georgia, Athens,  
27 GA USA

28  
29 <sup>9</sup>Center for Phage Technology, Texas A&M University, College Station, TX USA

30  
31  
32 Running Head: Shiga toxin–producing *E. coli*-induced gastrointestinal disease

33  
34  
35 <sup>¶</sup>These authors contributed equally to this work. Author order was determined by whom  
36 prepared final version of research article for submission.

37 <sup>#</sup>Address Correspondence to Jason J. Gill, [jason.gill@tamu.edu](mailto:jason.gill@tamu.edu)

38

## 39 **Abstract**

40 Post-weaning enteropathies in swine caused by pathogenic *E. coli*, such as post-weaning diarrhea  
41 (PWD) or edema disease (ED), remain a significant problem for the swine industry. Reduction in  
42 the use of antibiotics over concerns of antibiotic resistance and public health concerns,  
43 necessitate the evaluation of effective antibiotic alternatives to prevent significant loss of  
44 livestock and/or reductions in swine growth performance. For this purpose, an appropriate piglet  
45 model of enterotoxigenic *E. coli* enteropathy is required. In this study, we attempted to induce  
46 clinical signs of post-weaning disease in a piglet model using a one-time acute or lower daily  
47 chronic dose of a Shiga toxin–producing and enterotoxigenic *E. coli* strain. The induced disease  
48 state was monitored by determining fecal shedding and colonization of the challenge strain,  
49 animal growth performance, cytokine levels, fecal calprotectin, histology, fecal metabolomics,  
50 and fecal microbiome shifts. The most informative analyses were colonization and shedding of  
51 the pathogen, serum cytokines, metabolomics, and targeted metagenomics to determine  
52 dysbiosis. Histopathological changes of the gastrointestinal (GI) tract and tight junction leakage  
53 as measured by fecal calprotectin concentrations were not observed. Chronic dosing was similar  
54 to the acute regimen suggesting that a high dose of pathogen, as used in many studies, may not  
55 be necessary. The piglet disease model presented here can be used to evaluate alternative PWD  
56 treatment options. Furthermore, this relatively mild disease model presented here may be  
57 informative for modeling human chronic gastrointestinal diseases, such as inflammatory bowel  
58 disease, which otherwise require invasive procedures for study.

59

## 60 **Importance**

61 Post-weaning diarrhea remains a significant problem in swine production and appropriate models  
62 of pathogenesis are needed to test alternative treatment options. In this study, we present an *E.*  
63 *coli* induced piglet model for post-weaning diarrhea, and also explore its translational potential  
64 as a model for human intestinal inflammation. Our study here presents two firsts to our  
65 knowledge. 1) The first simultaneous analysis of the intestinal microbiome and metabolome  
66 through fecal sampling of piglets challenged with Shiga toxin–producing *E. coli*. This is valuable  
67 given the limited metabolomics data from swine in various disease states. 2) A comparison of the  
68 clinical signs caused by a daily chronic vs one-time dosing regimen of *E. coli*. This comparison  
69 is key as infection by pathogenic *E. coli* in real-world settings likely occurs from chronic  
70 exposure to contaminated food, water, or environment rather than the highly concentrated dose  
71 of pathogen that is commonly given in the literature.

72

## 73 **Introduction**

74 Post-weaning diarrhea (PWD) and edema disease (ED) following the weaning period in piglets  
75 remain significant problems for the swine industry and can result in significant economic losses  
76 (1-3). PWD is characterized by diarrhea which can lead to severe dehydration, emaciation, and  
77 death. While ED of swine is characterized by submucosa edemas of the stomach and mesocolon  
78 resulting in swelling of eyelids, forehead, and in some cases hemorrhagic gastroenteritis leading  
79 to eventual death (2). Pathogenic *Escherichia coli* is the primary cause of these diseases in  
80 swine, and the transitional period of weaning leaves piglets susceptible to infection by  
81 pathogenic strains of *E. coli* (3, 4). While PWD and ED are generally caused by enterotoxigenic  
82 *E. coli* (ETEC) and Shiga toxin–producing *E. coli* (STEC), respectively, they affect similarly

83 aged pigs and there can be considerable crossover between serotypes and associated virulence  
84 factors. PWD ETEC are primarily associated with *E. coli* producing heat-stable and/or heat-  
85 labile enterotoxin, while ED STEC are associated with Shiga toxin, primarily the 2e subtype  
86 (Stx2e), producing strains, which can be expressed with or without other enterotoxins (5). The  
87 antibiotic colistin has been the classical treatment for pathogenic *E. coli* in swine, however given  
88 concerns over antibiotic resistance, alternative treatment options should be explored (1). To  
89 evaluate alternative treatment options, a comprehensive ETEC/STEC model of pathogenesis in  
90 swine is necessary to evaluate efficacy of alternative treatments to antibiotics. Furthermore, such  
91 an ETEC/STEC induced swine model of gastroenteritis could also serve as model for  
92 ETEC/STEC induced enteropathy in humans.

93 Swine are used widely in biomedical research as a proxy for humans, due to similar physiology,  
94 immune systems, intestinal permeability, and intestinal enzymatic profiles. Weaned pigs  
95 represent a possible model for human ETEC or STEC infections as porcine gastrointestinal  
96 anatomy, immune response, and ETEC clinical signs closely mimic that of humans (6). Swine  
97 inoculated with ETEC experience sloughing of intestinal villi, increased crypt depths, and scours  
98 (7). It has been shown that ETEC infections in weanling pigs can be caused by a single dose of  
99 approximately  $10^9$  CFU (8, 9). However, this high acute single dose most likely does not  
100 accurately represent the real-world scenario of PWD or ED in which piglets are more likely  
101 initially infected by chronic exposure to lower doses of *E. coli* as ETEC/STEC can be found in  
102 contaminated feed, water, soil, and elsewhere in the barn environment (2). The objective of the  
103 present study was to develop and characterize a Shiga toxin-producing *E. coli* induced weaned  
104 swine model of PWD/ED. Given the *E. coli* strain used in this work encodes heat-labile  
105 enterotoxin IIA (LT-IIA), heat-stable enterotoxin II (STIIB), as well Shiga toxin (Stx2e) it will

106 henceforth be referred to simply as an STEC strain, despite it technically classifying as both an  
107 ETEC and STEC. We also sought to evaluate differences in dosing regimens, comparing a one-  
108 time high acute dose to a lower daily chronic dose of STEC. To our knowledge, this is the first  
109 reported comparison on the effects of a one-time high acute dose vs a lower chronic daily dose in  
110 an animal model. Furthermore, comparing the single- or repeated-dose models in swine is critical  
111 to being able to evaluate the piglet model as potential model for human ETEC or STEC induced  
112 enteropathies, particularly for the study of chronic inflammatory gastrointestinal disorders.

## 113 **Results and Discussion**

### 114 **Growth performance**

115 Pigs used as an experimental model for enteric enteropathy were challenged with a spontaneous  
116 nalidixic acid-resistant mutant of *Escherichia coli* strain NCDC 62-57 (ATCC 23545) referred to  
117 hereafter simply as *E. coli* 62-57nal in either a single acute high-titer dose ( $\sim 10^9$  CFU), or in a  
118 series of daily lower-dose challenges ( $\sim 10^7$ - $10^8$  CFU). All pigs were held for two days prior to  
119 the start of the trial and were asymptomatic for gastroenteritis. Additionally, pigs were not  
120 colonized by organisms capable of forming colonies on MacConkey amended with 50  $\mu$ g/ml  
121 nalidixic acid (MacConkey+nal), and no endogenous phage infecting *E. coli* 62-57nal were  
122 identified. Thirty-six presumptive coliform colonies from pooled fecal samples plated on  
123 MacConkey agar (0  $\mu$ g/ml Nal; three colonies per pen) were also tested by PCR for the presence  
124 of Shiga toxin type 1 (Stx1), Shiga toxin type 2 (Stx2), heat-stable enterotoxin I (ST1), heat-  
125 stable enterotoxin II (ST2) and heat-labile toxin (LTI). All colonies were negative for Stx1,  
126 Stx2, ST2 and LTI, but three colonies were positive for ST1. Presence of ST1 gene alone is not a

127 strong predictor of ability to cause disease (8, 10, 11) and pigs were asymptotic, so all animals  
128 were retained in the study.

129 In general, pigs administered *E. coli* 62-57nal via both the acute and chronic dosing regimens  
130 presented similar clinical signs with the majority of pens developing scours by day 2 and  
131 continuing through day 6. Control pens had visibly soft feces on day 5 and 6 with a single  
132 incident of scours on day 6, however the animals in control pens remained visibly healthy  
133 throughout the trial period. Additionally, the control pen with the incidence of scours was culture  
134 negative for the inoculated *E. coli* 62-57nal throughout the trial, so scours may have been  
135 induced by stress or other native microbiota. There was no evidence of difference for overall  
136 average daily gain (ADG), average daily feed intake (ADFI), and gain:feed (G:F) of the different  
137 treatment groups ( $P > 0.184$ , Table 1). However, there were numerical differences between pigs  
138 fed the treatments, suggesting that the modest number of replicates and the inherently high post  
139 weaning variability in performance were responsible for the failure to detect significant  
140 differences in growth performance. This lack of evidence for significant growth differences is  
141 similar to previously reported results (12). Pigs administered the acute and chronic dose of *E.*  
142 *coli* 62-57nal had a 54.7% and 14.9% reduction in ADG compared to the control pigs,  
143 respectively (Table 1). The control group had the lowest ADFI among the three treatments with  
144 acute and chronic dosing regimens increasing feed intake by 17.3% and 29.95%. These findings  
145 are in agreement with previous work that showed a 24% decrease in control pigs ADFI  
146 compared to the pigs inoculated with ETEC O149 on d 3 to d 6 (9). Madec et al. (13) had similar  
147 results with a decrease in weight of weaned piglets inoculated with pathogenic *E. coli* expressing  
148 K88 fimbriae from day 0 to day 2 which then recovered by day 9 of the trial. In this study, the  
149 acute challenge group had the poorest mean G:F conversion with the control group having the

150 highest mean feed efficiency. Piglets experiencing PWD have been reported to exhibit reduced  
151 weight gains (3, 14), however statistically significant reductions in weight performance were not  
152 observed, perhaps due to the relatively brief duration of the trial or small sample sizes.

### 153 **Bacterial colonization and fecal shedding**

154 The ability of *E. coli* 62-57nal to colonize the gastrointestinal tract of inoculated piglets was  
155 determined by measuring colony-forming units recovered from intestinal mucosa, intestinal  
156 luminal contents, and in feces. Inoculated strain counts adherent to the mucosal lining were found  
157 to be variable, with ~50% of samples, ranging from 0.21 to 1.71 g of intestinal scraping, yielding  
158 counts above the detection limit (5000 CFU/ml of tissue homogenate). Of the samples yielding  
159 enumerable colonies, bacterial counts ranged from  $\sim 10^4$  to  $\sim 10^7$  CFU/g in the duodenum, jejunum,  
160 ileum, cecum and colon (Fig 1A). Bacterial counts in the cecal and colonic luminal contents,  
161 ranging from 0.14 to 11.07g of digesta, were more reliably above the detection limit and ranged  
162 from  $\sim 10^3$  to  $10^9$  CFU/g, suggesting bacterial proliferation in the unattached population.

163 Acute and chronic treatments had higher prevalence of STEC in feces ( $\sim 10^5$  to  $10^7$  CFU/g) than  
164 control pigs on all sampling days (Fig 1B) Control pens sporadically shed *E. coli* 62-57-nal in the  
165 feces at levels near the lower detection limit (500 CFU/g), likely reflecting low levels of pen cross-  
166 contamination. Pigs administered the acute STEC dose exhibited significantly higher fecal  
167 shedding on day 1 ( $\sim 10^7$  CFU/g,  $P = 0.001$ ) compared to the chronic dose, however there was no  
168 statistically significant difference in fecal STEC counts between the acute and chronic treatments  
169 after d 1. This result is consistent with other piglet studies which observed peak shedding between  
170 24 and 48 hours post-inoculation (15, 16). Pathogen shedding in the acute group remained high  
171 through d 6, indicating that the *E. coli* 62-57nal was able to persistently colonize the  
172 gastrointestinal tract of swine.

## 173 **Markers of inflammation and intestinal leakage**

174 Infection-induced inflammation is mediated by increased levels of pro-inflammatory cytokines  
175 (17). Interleukins 6 and 8 (IL-6 and IL-8) are useful biomarkers since they have been linked to  
176 intestinal inflammation (18-21). On d 6 of the study, pigs challenged with STEC had increased ( $P$   
177  $< 0.05$ ) concentrations of serum IL-6 compared to control pigs (Fig 2). However, there was no  
178 difference in IL-6 concentrations between acute and chronic treatments. Similar elevations of IL-  
179 6 were also observed in the treatment groups of a bacterially induced murine model of chronic  
180 intestinal inflammation (22). For concentrations of IL-8, there was a marginally significant overall  
181 treatment effect on d 6 ( $P = 0.089$ ): chronic pigs had increased ( $P < 0.05$ ) serum IL-8  
182 concentrations compared to control pigs, and acute dose pigs were intermediate ( $P = 0.5423$ ). Lee  
183 *et al.* (23) observed peak serum IL-8 levels in ETEC-challenged piglets between day 0 and 2 which  
184 then declined through d 7. This could explain the lower levels of serum IL-8 in the acute challenge  
185 group as serum cytokines were measured six days after acute challenge, while the daily chronic  
186 challenge may maintain elevated IL-8 concentrations. Increased levels of IL-6 and IL-8 in response  
187 to challenge with *E. coli* 62-57nal is in agreement with prior work demonstrating these cytokines  
188 as markers of inflammation and infection (22, 23).

189 Increased concentrations of fecal calprotectin have been positively correlated with the histological  
190 activity of inflammatory bowel disease in humans (24), and serve as a marker of neutrophilic  
191 intestinal inflammation (25). Past studies have investigated calprotectin in swine plasma, intestinal  
192 lumen, and jejunal mucosa, all of which were found to be correlated with bacterial infection (26).  
193 In the present study, there were no significant treatment effects on fecal calprotectin concentration.  
194 This is the first study to our knowledge to test fecal calprotectin in pigs inoculated with *E. coli*,  
195 and this indicates calprotectin may not be an informative biomarker in this model.



## 196 **Villi length and histopathology**

197 Previous studies involving swine challenged with ETEC strains have reported villous atrophy and  
198 reductions in crypt depth (27); similar symptoms have also been reported in chronic intestinal  
199 enteropathies in humans (28). At time of necropsy, sections were collected to evaluate villi length  
200 in the piglet model, but no morphologic changes were observed between treatment groups. General  
201 bacterial rod attachment was evaluated by an anatomic pathologist and observed sporadically in  
202 all samples with no apparent correlation between rod attachment and direct bacterial plating as  
203 only 38% (11/29) of samples with rod attachment tested positive for *E. coli* 62-57nal by direct  
204 plating. Villus length in STEC challenged animals did not differ from the controls in the  
205 duodenum (P=0.7125), jejunum (P=0.3719), and ileum (P=0.778). Lack of villus blunting may be  
206 due to the limited duration of this study. A prior longer-term study (21 d), with a murine model of  
207 chronic intestinal inflammation obtained villus blunting through a combination of bacterial  
208 challenge and malnutrition (22). Similarly, post-weaning anorexia in piglets has been shown to be  
209 associated with reduced villus heights (29). Therefore, given a longer trial period and/or  
210 malnourishment, blunting may have been eventually observed in our present model. Histology is  
211 also only able to evaluate a tiny fraction of the intestinal tract, so lesions must be broadly  
212 distributed throughout the tissue to be detectable by this method. Based on this data, histologic  
213 analysis does not appear to be a useful method for evaluating this model.

## 214 **Effects on the microbiome by 16S qPCR analysis**

215 To observe any changes of the gut microbiota caused by our acute or chronic dosing treatments,  
216 targeted 16S qPCR was performed for select bacterial groups on fecal samples collected from  
217 pens at day -1, day 1, day 3, and day 6. Relative abundances obtained were consistent with  
218 previous examinations of the piglet microbiome, showing a microbiome dominated by

219 *Bacteroidetes* and *Firmicutes* (30, 31). Overall, the bacterial groups tended to increase relative to  
220 control and pre-treatment samples, likely due to natural microbiome succession. A summary of  
221 these significant ( $P < 0.05$ ) or marginally significant ( $P < 0.10$ ) bacterial group changes at each  
222 time point is shown in Table 2. Both acute and chronic STEC doses impacted relative quantities  
223 of *E. coli* populations compared to the control. Additionally, both dosing regimens had  
224 comparable impacts on microbiome progression. Pretreatment compared to post-treatment  
225 samples of the acute dose had the most significant/marginally significant changes with eight of  
226 the ten tested bacterial taxa (*Bacteroidetes*, *Enterococcus*, *Faecalibacterium*, *Firmicutes*,  
227 *Lactobacillus*, *Streptococcus*, *Fusobacterium*, and Universal) showing increased populations.  
228 The chronic treatment showed similar but less dramatic changes, with six of ten taxa  
229 (*Bacteroidetes*, *Enterococcus*, *Lactobacillus*, *Streptococcus*, *E. coli*, and *Ruminococcaceae*)  
230 showing increased levels from pre- to post-treatment. The control group showed only two altered  
231 bacterial groups, *Enterococcus* and *E. coli*, from pre- to post-treatment. The observed increase  
232 for *Enterococcus* and *E. coli* within the control treatment is consistent with the previously  
233 reported natural post-weaning piglet microbiome maturation which shows an increase in levels  
234 of *Enterococcus* and *Enterobacteriaceae* at 8 days post-weaning (32). The acute dose of *E. coli*  
235 had a slightly more pronounced impact on the gut microbiome maturation than the chronic dose,  
236 however both acute and chronic treatments were sufficient to cause a detectable dysbiosis.

237 Principal component analysis (PCA) of 16S qPCR results also provides clear evidence of  
238 dysbiosis in STEC-treated groups (Fig 3A). PCA of pre- vs post-treatment samples indicates that  
239 by day 6 the acute treatment clearly clustered away from its pretreatment sample, while the  
240 chronic day 6 sample showed an intermediate clustering from its pre-treatment sample. In  
241 contrast, the control group remained tightly clustered throughout the trial period. This contrast in

242 clustering suggests the microbiome perturbations are induced by the *E. coli* challenge and are not  
243 merely normal microbiota progression. The observed relative stability of the control microbiome  
244 is consistent with other studies, which reported a microbiome shift immediately after weaning  
245 and reached relative stability within 10 days after weaning (31). These findings indicate that both  
246 the single acute dose and the chronic lower dose of STEC caused varying degrees of a similar  
247 dysbiosis. While in this present study the acute dose of STEC provided a more pronounced  
248 microbiome defect, the slight alteration caused by the chronic dose may still be more reflective  
249 of chronic subclinical enteropathies.

### 250 **Alterations in the fecal metabolome**

251 To further characterize the differences in disease state caused by acute and chronic STEC  
252 challenge, untargeted metabolomics was performed on fecal samples collected pretreatment (d -  
253 1) and days 1, 3 and 6 post-treatment. Metabolite profiles of fecal samples were analyzed by  
254 Metaboanalyst (33). Analysis of the identifiable metabolites by PCA clearly distinguished  
255 between challenge and control groups (Fig 3B). Similar to the results of microbiome analysis  
256 (Fig 3A), the acute and chronic day 6 samples clearly cluster separately from their pre-treatment  
257 samples, while the control samples did not separate. The stability of the control group indicates  
258 the natural enzymatic, microbial, and structural maturation of the weaned piglet gut (32) was not  
259 responsible for the observed shifts in the acute or chronic treatment groups.

260 As with the 16S qPCR approach, metabolomic comparison of post-treatment samples with their  
261 respective pre-treatment samples was more informative when identifying significant changes in  
262 individual metabolites. Volcano plots (p-value <0.10 and >2-fold change) were used to identify  
263 metabolites that significantly changed following treatment (33) (Fig 4). A full list of metabolites  
264 identified by volcano plot is provided in S1 Table. Given the Human Metabolome Database (34)

265 is much more comprehensive, particularly for diseased states, than the Livestock Metabolome  
266 Database (35), metabolites identified in this manner were categorized based on the Human  
267 Metabolome Database chemical taxonomy. Only four identified metabolites were shared  
268 between the chronic and control groups, and ten were common to both the chronic and acute  
269 treatment groups (Fig 4). Changes in metabolites in the control group were presumed to be  
270 associated with the normal development of the weaned piglet gastrointestinal tract.

271 Within the chronic and acute treatments, increased levels of amino acid metabolites were  
272 identified in the post-treatment samples, including lysine, ornithine, homoserine, histidine,  
273 tyramine, beta-alanine, (Fig 4, S1 Table). The increased levels of amino acids and amino acid  
274 metabolites in post-treatment fecal samples suggests the STEC treatment led to amino acid  
275 malabsorption and/or secretion, likely due to disruption of chemical gradients, inflammation, and  
276 microbiome perturbations within the gut caused by STEC treatment. Additionally, metabolites  
277 associated with bacterial amino acid degradation, 5-aminovaleric acid and putrescine, were  
278 found at increased levels within acute and chronic treatment samples. These have been  
279 previously associated with ulcerative colitis (36, 37). The presence of these metabolites is  
280 consistent with the model that suggests inflammation caused by STEC treatment induced amino  
281 acid malabsorption and subsequent degradation by the resident microbiota. This observation of  
282 increased fecal amino acid and amino acid metabolite levels agrees with other studies examining  
283 fecal metabolite profiles of humans with inflammatory bowel diseases like ulcerative colitis and  
284 Crohn's disease (38, 39).

285 Fecal metabolites that were significantly reduced in post-STEC treatment samples were  
286 primarily fatty acid metabolites (Fig 4), including stearic acid, myristic acid, and arachidic acid.  
287 The levels of lipid-soluble alpha-tocopherol (vitamin E) was also reduced in both treatment

288 groups. The observed depletion of fatty acids within the feces may be indicative of immune  
289 system activation, which is supported by our observation of increased levels of serum IL-6 and  
290 IL-8. Growing evidence on the importance of “immunometabolism” suggests activated  
291 macrophage subtypes and chronically activated T-cells demonstrate increased uptake of fatty  
292 acids as they rely more on fatty acid oxidation in order to maintain the high energy levels  
293 required to mount an immune response (40, 41). Prior studies examining metabolomic profiles of  
294 human inflammatory bowel diseases found pronounced decreases in the levels of short chain  
295 fatty acids (SCFA), which are the end products of bacterial fermentation that are absorbed by the  
296 large intestine; this presumably signaled a dysbiosis of gut flora (38, 39). In our current study a  
297 reduction in the SCFA metabolites butyrate, alpha-ketoglutarate and fumaric acid were observed.  
298 Our metabolomic findings indicate both the chronic and acute STEC treatments caused sufficient  
299 dysbiosis to statistically distinguish pre- and post-treatment samples (Fig 3B) in large part due to  
300 amino acid malabsorption and reduction in fatty acid metabolites (Fig 4), generating  
301 metabolomic profiles resembling those of human inflammatory gastrointestinal diseases.

### 302 **Whole genome sequencing**

303 To better understand the gene content of *E. coli* 62-57nal that may contribute to its  
304 pathogenicity, its genome was sequenced. The genome of *E. coli* 62-57nal was assembled into  
305 378 contigs of greater than 200 bp totaling in 5.6 Mbp length and at an average 45-fold coverage.  
306 The entire set of 378 contigs was submitted for sequence typing using SerotypeFinder v1.1 (42)  
307 and confirmed to be O138 and H14 as reported previously (43). Analysis of the assembled  
308 contigs by BLASTx (>40% identity, E value <10<sup>-5</sup>) against a database of known *E. coli* virulence  
309 genes identified a number of genes in *E. coli* 62-57nal associated with pathogenesis, shown in S2  
310 Table. Major identified virulence factors in *E. coli* 62-57nal include hemolysin (*hlyABCD*),

311 Shiga toxin (*stx2e*), an intimin-like adhesin (*fdeC*), heat-stable enterotoxin II (*stiI*), heat-labile  
312 enterotoxin IIA (*eltAB*), an iron scavenging cassette (*chuUAVYTWXS*), and the F18ac<sup>+</sup> fimbrial  
313 adhesin. Hemolysin (Hly) is an exotoxin that is associated with many pathogenic strains of *E.*  
314 *coli* (44). Hemolysin is primarily thought to have a role in pathogenesis in extra-intestinal  
315 infections, such as those of the urinary tract or septicemia and studies have shown that Hly plays  
316 little to no role in clinical signs of diarrhea (45). However recent data, using both in-vivo murine  
317 and in-vitro models, show secretion of Hly can disrupt tight-gap junctions and increase colonic  
318 mucosal inflammation (46, 47). This inflammation from Hly has been proposed as a contributing  
319 factor for ulcerative colitis in humans, a chronic inflammation (46). Consistent with *E. coli* 62-  
320 57's original edema isolation source, an Stx2e Shiga toxin was identified on a putative prophage  
321 element. The Stx2e subtype is known to be associated with edema disease of swine (48),  
322 however in our present study we did not observe signs of edema in challenged piglets. The  
323 primary contributors to the observed scouring phenotype were most likely the identified heat-  
324 stable enterotoxin II (STIIB) and heat-labile enterotoxin IIA (LT-IIA). While acting by different  
325 modes, both STIIB and LT-IIA have been shown to cause release of water and electrolytes from  
326 host membranes, thereby causing diarrhea or scours (11, 49). Heat stable and heat labile  
327 enterotoxins are the most common exotoxins that are associated with diarrhea in piglets, present  
328 in 72% and 57% of ETEC isolates from piglet scours, respectively (50). *E. coli* 62-57nal also  
329 contains a number of virulence factors associated with colonization and survival within the host,  
330 including the iron scavenging *chu* genes and various adhesin genes coding for the proteins  
331 AIDA-I autotransporter, F18ac<sup>+</sup> fimbrial adhesin, and the intimin-like FdeC (44, 50, 51). Taken  
332 together, the presence of these virulence factors explains the observed diarrhea/scouring and  
333 colonization phenotype. Furthermore, the enterotoxin mode of action that induces this diarrhea

334 also disrupts the Na<sup>+</sup> gradient (49), which amino acid absorption is dependent upon in the gut  
335 (52), likely explaining the increased amino acid levels observed in the fecal metabolomes of  
336 ETEC-challenged animals.

## 337 **Conclusion**

338 Suitable piglet models exploring the pathogenesis of the *E. coli* pathotypes responsible for  
339 common post-weaning diseases like PWD and ED are necessary for evaluating alternative  
340 treatment options. Furthermore, appropriate animal models are also imperative for the  
341 advancement of knowledge in human disease as well as the development of therapeutic  
342 interventions. Rodent models have often been used as disease surrogates, however these models  
343 are at a disadvantage when it comes to accurately representing human diseases and syndromes.  
344 Swine more accurately resemble humans in anatomy, genetics, and physiology, making them a  
345 more appropriate model for human biomedical research (6). The model presented here may serve  
346 as a model for evaluation of novel PWD treatments. Additionally, this model could serve as  
347 general model for acute or chronic human enteropathies, in which an underlying microbiome  
348 dysbiosis is the presumed cause, like ulcerative colitis, Crohn's disease (53), or environmental  
349 enteropathy (28). Many of the differential metabolites identified in this study (Fig. 4) and  
350 increases in inflammatory cytokines (Fig. 2) reflect those found in human chronic inflammatory  
351 disorders (53, 54). In this study, weaned piglets were challenged with either a single bolus of  
352  $\sim 10^9$  CFU of a pathogenic STIIB<sup>+</sup>, Stx2e<sup>+</sup>, and LT-IIA<sup>+</sup> *E. coli* strain or daily doses of  $\sim 10^8$   
353 CFU of the same strain. Both chronic and acute treatment groups exhibited significant increases  
354 in fecal STEC shedding, intestinal STEC colonization and serum IL-6 levels compared to  
355 controls (Fig 1, 2). Furthermore, both treatments induced similar levels of dysbiosis as measured  
356 by targeted 16S qPCR and untargeted metabolomics (Fig 3). These findings imply that high

357 acute doses of inoculum, as are often utilized in studies of *E. coli* gastrointestinal disease in pigs,  
358 are not necessarily required to establish a disease state, and lower levels of inoculum may  
359 represent a comparable disease state important for the study of chronic inflammation. In this  
360 study, fecal calprotectin measurements and histological examination of intestinal sections from  
361 challenged animals did not indicate any significant differences between control and treatment  
362 groups. Given the lack of blunted villi in this work which was previously associated with PWD,  
363 future studies employing the model described here may benefit from an extended trial period, as  
364 well as controlled changes in animal nutrition, to achieve blunted villi, and if for the evaluation  
365 of human disease, possibly the use of a defined humanized microbiota established in germ-free  
366 animals.

## 367 **Materials and Methods**

### 368 **Bacterial strains and culture conditions**

369 *Escherichia coli* strain NCDC 62-57 (O138:K81(B):H14) was originally isolated from swine  
370 showing clinical signs of porcine edema disease (43). This strain was obtained from the ATCC  
371 (ATCC 23545). A spontaneous nalidixic acid-resistant mutant of this strain was isolated and  
372 used throughout this work, and will be referred to as strain 62-57nal. This mutation was stable  
373 through multiple consecutive transfers. The bacterium was routinely cultured in LB broth (Bacto  
374 tryptone 10 g/L, Bacto yeast extract 5 g/L, NaCl 10 g/L) or on LB agar plates (LB broth plus 15  
375 g/L Bacto agar) aerobically at 37°C. Samples obtained from animals challenged with *E. coli* 62-  
376 57nal were plated on MacConkey agar (Becton-Dickinson) amended with 50 µg/ml nalidixic  
377 acid (MacConkey+nal).

### 378 **Whole genome sequencing of *E. coli* 62-57nal**



379 Total DNA was extracted from an overnight culture of *E. coli* 62-57nal using the Qiagen DNeasy  
380 Blood and Tissue Kit following the manufacturer's specifications for bacterial cells (Qiagen, Cat  
381 No. 69504). Isolated genomic DNA was sequenced on the Illumina MiSeq platform using  
382 Illumina V2 500 cycle reagent chemistry generating paired-end 250 bp reads. Reads were quality  
383 controlled using FastQC (bioinformatics.babraham.ac.uk), FastX Toolkit (hannonlab.cshl.edu),  
384 and assembled using SPAdes 3.5.0 (55) at *k*-mer settings of 21,33,55. Contigs <200 bp or with  
385 aberrantly low coverage (<8 fold) were filtered from the assembly to yield 378 contigs totaling  
386 5.6 Mbp with ~45-fold average coverage. The resulting contigs were deposited to Genbank  
387 under Bioproject/Accession (PRDF00000000), and underwent automated annotation using the  
388 NCBI Prokaryotic Genome Annotation Pipeline (56).

389 Putative virulence factors were identified based on homology using BLASTx of WGS contigs  
390 with a custom database of *E. coli* virulence factors containing *E. coli*-associated proteins  
391 contained in mVirDB (57) and characterized *E. coli* virulence factors (44). As a control, the  
392 genome of the non-pathogenic lab strain of *E. coli* MG1655 (Accession: GCF\_000005845.2) was  
393 analyzed against the same database. Hits in common from MG1655 and 62-57nal were excluded  
394 based on the presumption that they were part of the non-pathogenic *E. coli* gene repertoire.

395 Protein sequences identified in this initial screening were extracted from the 62-57nal genome  
396 and manually investigated using BLASTp and InterProScan to confirm conserved domains were  
397 intact and putative gene products were approximately full length (58, 59). The supplied O- and  
398 H- antigen serotype provided by ATCC were also confirmed bioinformatically using the  
399 SerotypeFinder v1.1 tool located at the Center for Genomic Epidemiology website (42).

400 **Weaned piglet challenge model of *E. coli* 62-57nal**

401 **Animals and facilities.** All procedures involving animals and their care were approved and  
402 monitored by the Animal Care and Use Committee of the USDA Southern Plains Agricultural  
403 Research Center (SPARC) and the Texas A&M University Institutional Animal Care and Use  
404 Committee. A group of 24 weaned barrows (Landrace × Large White, initial mean BW 6.35 kg)  
405 were housed at SPARC in College Station, TX. Pigs were randomly assigned to pens (4.634 m<sup>2</sup>)  
406 with 2 barrows per pen that had solid concrete flooring and was equipped with a nipple waterer,  
407 rubber mat, and feeder. Pigs were provided *ab libitum* access to water and feed; the diet was a  
408 standard phase 1 nursery pig pelleted diet (S3 Table) formulated to meet or exceed the National  
409 Research Council (2012) recommended requirements of nutrients.

410 **STEC challenge trial.** The pigs were held 2 d prior to the start of treatment in order to be pre-  
411 screened for endogenous enterotoxigenic *E. coli* (ETEC). Pigs were randomly allotted to one of  
412 three treatments: Non-challenged control, acute challenge (a single dose of ~10<sup>9</sup> CFU), and  
413 chronic challenge (a daily dose of ~10<sup>7</sup>-10<sup>8</sup> CFU). Each treatment had a total of 4 pens, 2 pigs  
414 per pen, for n=8 pigs total. All pigs were housed in the same barn, with pens separated by empty  
415 pens to prevent cross-contamination between treatments. *E. coli* 62-57nal was cultured overnight  
416 (16-18 h) in Tryptic Soy Broth (TSB; B-D Bacto) at 37 °C with aeration. The acute treatment  
417 received a single dose of 6 ml of overnight *E. coli* culture on d 1 and the chronic treatment  
418 received a daily dosage of 6 ml of a 10-fold dilution in phosphate buffered saline (PBS, Corning  
419 Cellgro) starting on d 1 until the termination of the trial. Pigs and feeders were weighed on d 0,  
420 1, 3, and 6 for calculation of average daily gain (ADG), average daily feed intake (ADFI), and  
421 gain to feed (G:F). The d 1 collection of weight data, feces, and blood was approximately 12 h  
422 after the initial *E. coli* dose was administered. All animals were humanely euthanized and

423 necropsied on d 7 for collection of intestinal scrapings and sections which were used for analysis  
424 of *E. coli* colonization and determination of villi blunting, respectively.

#### 425 **Pre-screening of animals for endogenous phage and ETEC**

426 Prior to the trial initiation (d -1), pigs were screened for endogenous pathogenic *E. coli*, *E. coli*  
427 phages, and enteric bacteria capable of growing in the presence of 50 µg/ml nalidixic acid.  
428 Briefly, approximately 1 g of feces from each pen was mixed with 9 ml PBS, vortexed until  
429 homogenous, serially diluted (10-fold increments), and plated onto both MacConkey agar plates  
430 and MacConkey+nal. A chloroformed aliquot of the first sample dilution was plated onto Tryptic  
431 Soy Agar (TSA) plates overlaid with 0.5% top agar (5 g Tryptone, 5 g NaCl, 500 ml dH<sub>2</sub>O,  
432 0.5% w/v Agar) inoculated with 100 µl from an overnight culture of *E. coli* 62-57nal.  
433 MacConkey+nal plates were screened for breakthrough colonies and TSA plates were screened  
434 for plaque formation or zones of clearing to determine phage presence. After overnight  
435 incubation, 3 colonies were selected from MacConkey plates from each pen and mixed with 150  
436 µl Tris EDTA (TE) buffer. Each sample was boiled for 10 minutes then centrifuged at 8,000 x g  
437 for 2 minutes. These colonies were screened via multiplex PCR for: Universal stress protein A  
438 (*uspA*), heat-labile toxin (LTI), heat-stable enterotoxin I (STI), heat-stable enterotoxin II (STII),  
439 Shiga toxin type 1 (Stx1) and Shiga toxin type 2 (Stx2) using previously established and  
440 validated primers (60, 61). Positive bands of appropriate size were confirmed using individual  
441 primer sets and resultant PCR products were visualized on a 1.5% agarose gel with gel red  
442 (Biotium).

#### 443 **Fecal collection and determination of *E. coli* 62-57nal and fecal calprotectin within feces**

444 A representative fecal sample was collected from each pen on d 1, 3, and 6 to determine fecal *E.*  
445 *coli* populations. The samples were collected in individual, sterile 50 ml conical tubes and  
446 transported on wet ice to the laboratory. These fecal samples were processed and diluted in the  
447 same manner as described above, and were also spot plated (20  $\mu$ l) on MacConkey agar  
448 containing 50  $\mu$ g/ml nalidixic acid which were incubated for 10-12 h at 37°C to avoid colonies  
449 merging within the spots. Fecal calprotectin was determined by a commercially available porcine  
450 ELISA kit (MyBioSource, San Diego, CA) with a minimum detection limit of 6.25 ng/ml with  
451 an intra-assay CV of less than 15%.

#### 452 **Blood sampling and serum analysis**

453 Blood samples were collected from 2 pigs per pen on d 6. Blood was collected from the cranial  
454 vena cava via a 20 gauge needle and a 10 mL serum vacutainer tube (BD, with clot activator and  
455 gel for serum separation). Tubes were inverted and allowed a minimum of 30 minutes to clot.  
456 Samples were centrifuged at 1,600  $\times$  g for 10 min at 2 °C, and the separated serum samples were  
457 stored at -80°C until analysis was performed. Serum concentrations of interleukin 6 (IL-6) and  
458 interleukin 8 (IL-8) were determined via porcine ELISA kits (R&D Systems, Minneapolis, MN).  
459 The minimum detection for IL-6 was 18.8 pg/ml and 62.5 pg/ml for IL-8. Assays were  
460 conducted as outlined by the manufacturer.

#### 461 **Intestinal sampling and histology**

462 Pigs were humanely euthanized, necropsied, and had samples collected for intestinal histology  
463 and *E. coli* populations from the duodenum, jejunum, ileum, cecum, and colon. Segments of the  
464 small intestine (duodenum, jejunum, and ileum) and large (cecum and colon) intestine were tied  
465 off with plastic zip ties to prevent cross contamination. Adherent bacterial samples were

466 collected by rinsing the intestinal mucosal surface with sterile PBS, scraping a 2-3 cm section of  
467 the surface with a glass microscope slide, and then placing the sample into sterile 15 ml conical  
468 tubes containing 4.25 g of 2 mm glass beads (Walter Stern Inc.) and 8 ml of sterile PBS. Tissue  
469 scraping samples were vortexed for 5 min at 3000 rpm on a platform vortex mixer to  
470 homogenize samples. Cecum and distal colon contents were also collected and homogenized by  
471 thoroughly vortexing 0.5 - 5 g sample in 25 ml of PBS. Sample homogenates were serially  
472 diluted (10-fold increments) in PBS and spot-plated (20 ml) to MacConkey agar with 50 µg/ml  
473 nalidixic acid. All bacterial population estimates were normalized to the initial sample wet  
474 weight.

475 For histology, the distal end of each intestinal segment (duodenum, jejunum, ileum, cecum and  
476 colon) directly adjacent to the section used for bacterial sampling was collected. Samples were  
477 positioned onto a 5.08 cm x 5.08 cm cardboard sections and secured with small clips to prevent  
478 tissue curling. Consecutive tissue samples were fixed in Carnoy's solution (60% ethanol, 30%  
479 chloroform, 10% glacial acetic acid) at a 20:1 ratio for 30-45 min and 10% neutral buffered  
480 formalin (VWR scientific) at a 10:1 ratio for 24 h, followed by storage in 70% Ethanol until  
481 further processing. Tissues were trimmed into longitudinal sections of 5 mm width and  
482 embedded into paraffin using standard procedures (62). After processing, 4 µm sections were  
483 placed on slides and stained with hematoxylin and eosin and evaluated histologically in a  
484 treatment blinded fashion. The slides were analyzed by a board-certified pathologist for rod  
485 attachment, presence of inflammation, and morphological changes (i.e., villous blunting,  
486 epithelial erosion). A total of 12 pigs, 4 from each treatment, were randomly selected for the  
487 evaluation of villus length, and well-oriented and intact villi were measured from the lamina  
488 muscularis mucosae layer to villus tip.

## 489 **Analysis of fecal metabolites**

490 Fecal samples collected from the floors of pens on d -1, 1, 3 and 6 were lyophilized and sent to  
491 the West Coast Metabolomics Center at the University of California Davis for untargeted  
492 metabolomic analysis. Untargeted GC-TOF profiling was performed following previously  
493 published parameters (63). The resultant dataset is available on Metabolomics Workbench (64),  
494 under study number ST001041.

## 495 **16S qPCR**

496 For the purposes of quantifying select bacterial populations, microbial DNA was extracted from  
497 50 mg of lyophilized feces using the Zymo Quick-DNA Fecal/Soil Microbe Kits following the  
498 manufacturer's instructions. Five ng of DNA was used to amplify 16S regions of select bacterial  
499 groups using Biorad SsoFast EvaGreen Supermix using reaction conditions described previously  
500 (65) and family/genus/species specific primers described previously (65, 66). qPCR data is  
501 reported as  $\log_{10}$  of starting 16S copy number per 5 ng of DNA isolated. Specific primer sets  
502 used were for Universal, *Faecalibacterium*, *Streptococcus*, *E. coli*, *Fusobacterium*, *Firmicutes*,  
503 *Bacteroidetes*, *Lactobacillus*, *Ruminococaceae*, and *Enterococcus*.

## 504 **Statistical analysis**

505 Growth performance along with cytokine and intestinal bacterial population data were analyzed  
506 using the PROC MIXED procedure in SAS 9.3 (SAS Inst. Inc., Cary, NC). The model fixed  
507 effect was treatment with pen set as a random effect for growth performance, cytokine and  
508 intestinal bacterial population data. Fecal samples were collected on a pen basis, therefore pen  
509 was not included as a random effect. Calprotectin levels and fecal colony counts were analyzed  
510 as repeated measures using the PROC GLIMMIX procedure. Treatment, day, and treatment  $\times$

511 day served as fixed effects. Day of collection also served as the repeated measure with pen as the  
512 subject. Metabolite data was normalized to sum, mean-centered and divided by the standard  
513 deviation of each variable, and analyzed for significant or trending metabolites between  
514 treatments using MetaboAnalyst version 4.5 (33). Comparison of qPCR LOGSQ values was  
515 carried out using JMP Version 13 (SAS Inst. Inc., Cary, NC.). qPCR treatment means were  
516 compared pairwise on a per time point basis; many of the datasets did not pass the Shapiro-Wilk  
517 test for normality and were of small sample size, therefore treatments were compared using the  
518 nonparametric Wilcoxon Exact Test. qPCR data was also considered using multivariate methods  
519 on a pre/post treatment basis using principal component analysis (PCA). Results were  
520 considered significant at  $P \leq 0.05$  and marginally significant between  $P > 0.05$  and  $P \leq 0.10$ .

## 521 **Acknowledgements**

522 This work was supported, in whole or in part, by the Bill & Melinda Gates Foundation  
523 [OPP1139800]. Under the grant conditions of the Foundation, a Creative Commons Attribution  
524 4.0 Generic License has already been assigned to the Author Accepted Manuscript version that  
525 might arise from this submission. This work was additionally supported by Texas A&M AgriLife  
526 Research. The authors would like to thank Amanda Blake and So Young Park for assistance with  
527 qPCR. We would also like to thank Justin Leavitt, Jacob Chamblee, Jacob Lancaster, Lauren  
528 Lessor, Ruoyan Luo, Shayna Smith, Caitlin Older, Jeann Leal de Araujo, Kara Dunmire, Logan  
529 Joiner, and Lily Hernandez for their assistance with animal necropsy and sample preparation.

## 530 **Data Availability Statement**

531 Data supporting the findings of this study are available within this article and/or supplementary  
532 materials, additional supplements can be made available from corresponding author upon

533 reasonable request. Data pertaining to resultant metabolomic analysis is available at  
534 Metabolomics Workbench, under study number ST001041. Genomic sequencing data available  
535 from Genbank under Bioproject (PRDF00000000).

536

## 537 **References**

- 538 1. Rhouma M, Fairbrother JM, Beaudry F, Letellier A. 2017. Post weaning diarrhea in pigs: risk  
539 factors and non-colistin-based control strategies. *Acta Veterinaria Scandinavica* 59:31.
- 540 2. Fairbrother JM, Nadeau É. 2019. Colibacillosis, p 807-834, *Diseases of Swine*  
541 doi:<https://doi.org/10.1002/9781119350927.ch52>.
- 542 3. Fairbrother JM, Nadeau É, Gyles CL. 2007. *Escherichia coli* in postweaning diarrhea in pigs: an  
543 update on bacterial types, pathogenesis, and prevention strategies. *Animal Health Research*  
544 *Reviews* 6:17-39.
- 545 4. Imberechts H, De Greve H, Lintermans P. 1992. The pathogenesis of edema disease in pigs. A  
546 review. *Veterinary Microbiology* 31:221-233.
- 547 5. Frydendahl K. 2002. Prevalence of serogroups and virulence genes in *Escherichia coli* associated  
548 with postweaning diarrhoea and edema disease in pigs and a comparison of diagnostic  
549 approaches. *Veterinary Microbiology* 85:169-182.
- 550 6. Jiminez JA, Uwiera TC, Douglas Inglis G, Uwiera RR. 2015. Animal models to study acute and  
551 chronic intestinal inflammation in mammals. *Gut Pathog* 7:29.
- 552 7. Jones GW, Rutter JM. 1972. Role of the K88 Antigen in the Pathogenesis of Neonatal Diarrhea  
553 Caused by *Escherichia coli* in Piglets. *Infection and Immunity* 6:918-927.
- 554 8. Berberov EM, Zhou Y, Francis DH, Scott MA, Kachman SD, Moxley RA. 2004. Relative Importance  
555 of Heat-Labile Enterotoxin in the Causation of Severe Diarrheal Disease in the Gnotobiotic Piglet  
556 Model by a Strain of Enterotoxigenic *Escherichia coli* That Produces Multiple Enterotoxins.  
557 *Infection and Immunity* 72:3914-3924.
- 558 9. Wellock IJ, Fortomaris PD, Houdijk JGM, Kyriazakis I. 2008. Effects of dietary protein supply,  
559 weaning age and experimental enterotoxigenic *Escherichia coli* infection on newly weaned pigs:  
560 performance. *Animal* 2:825-833.
- 561 10. Wassenaar TM, Gunzer F. 2015. The prediction of virulence based on presence of virulence  
562 genes in *E. coli* may not always be accurate. *Gut Pathogens* 7:15.
- 563 11. Zhang W, Berberov EM, Freeling J, He D, Moxley RA, Francis DH. 2006. Significance of heat-  
564 stable and heat-labile enterotoxins in porcine colibacillosis in an additive model for  
565 pathogenicity studies. *Infect Immun* 74:3107-14.
- 566 12. Bhandari SK, Xu B, Nyachoti CM, Giesting DW, Krause DO. 2008. Evaluation of alternatives to  
567 antibiotics using an *Escherichia coli* K88+ model of piglet diarrhea: Effects on gut microbial  
568 ecology1. *Journal of Animal Science* 86:836-847.
- 569 13. Madec F, Bridoux N, Bounaix S, Cariolet R, Duval-Iflah Y, Hampson DJ, Jestin A. 2000.  
570 Experimental models of porcine post-weaning colibacillosis and their relationship to post-  
571 weaning diarrhoea and digestive disorders as encountered in the field. *Veterinary Microbiology*  
572 72:295-310.



- 573 14. Casewell M, Friis C, Marco E, McMullin P, Phillips I. 2003. The European ban on growth-  
574 promoting antibiotics and emerging consequences for human and animal health. *J Antimicrob*  
575 *Chemother* 52:159-61.
- 576 15. Owusu-Asiedu A, Nyachoti CM, Marquardt RR. 2003. Response of early-weaned pigs to an  
577 enterotoxigenic *Escherichia coli* (K88) challenge when fed diets containing spray-dried porcine  
578 plasma or pea protein isolate plus egg yolk antibody, zinc oxide, fumaric acid, or antibiotic. *J*  
579 *Anim Sci* 81:1790-8.
- 580 16. Jones PH, Roe JM, Miller BG. 2001. Effects of stressors on immune parameters and on the faecal  
581 shedding of enterotoxigenic *Escherichia coli* in piglets following experimental inoculation. *Res*  
582 *Vet Sci* 70:9-17.
- 583 17. Arango Duque G, Descoteaux A. 2014. Macrophage Cytokines: Involvement in Immunity and  
584 Infectious Diseases. *Frontiers in Immunology* 5.
- 585 18. Grimm MC, Elsbury SK, Pavli P, Doe WF. 1996. Interleukin 8: cells of origin in inflammatory  
586 bowel disease. *Gut* 38:90-98.
- 587 19. Gabay C. 2006. Interleukin-6 and chronic inflammation. *Arthritis research & therapy* 8 Suppl  
588 2:S3-S3.
- 589 20. Scheller J, Chalaris A, Schmidt-Arras D, Rose-John S. 2011. The pro- and anti-inflammatory  
590 properties of the cytokine interleukin-6. *Biochimica et Biophysica Acta (BBA) - Molecular Cell*  
591 *Research* 1813:878-888.
- 592 21. Guerrant RL, DeBoer MD, Moore SR, Scharf RJ, Lima AAM. 2013. The impoverished gut—a triple  
593 burden of diarrhoea, stunting and chronic disease. *Nature reviews Gastroenterology &*  
594 *hepatology* 10:220-229.
- 595 22. Brown EM, Wlodarska M, Willing BP, Vonaesch P, Han J, Reynolds LA, Arrieta MC, Uhrig M,  
596 Scholz R, Partida O, Borchers CH, Sansonetti PJ, Finlay BB. 2015. Diet and specific microbial  
597 exposure trigger features of environmental enteropathy in a novel murine model. *Nat Commun*  
598 6:7806.
- 599 23. Lee CY, Kim SJ, Park BC, Han JH. 2017. Effects of dietary supplementation of bacteriophages  
600 against enterotoxigenic *Escherichia coli* (ETEC) K88 on clinical symptoms of post-weaning pigs  
601 challenged with the ETEC pathogen. *J Anim Physiol Anim Nutr (Berl)* 101:88-95.
- 602 24. Roseth AG, Aadland E, Jahnsen J, Raknerud N. 1997. Assessment of disease activity in ulcerative  
603 colitis by faecal calprotectin, a novel granulocyte marker protein. *Digestion* 58:176-80.
- 604 25. Costa F, Mumolo MG, Bellini M, Romano MR, Ceccarelli L, Arpe P, Sterpi C, Marchi S, Maltinti G.  
605 2003. Role of faecal calprotectin as non-invasive marker of intestinal inflammation. *Dig Liver Dis*  
606 35:642-7.
- 607 26. Splichal I, Fagerhol MK, Trebichavsky I, Splichalova A, Schulze J. 2005. The effect of intestinal  
608 colonization of germ-free pigs with *Escherichia coli* on calprotectin levels in plasma, intestinal  
609 and bronchoalveolar lavages. *Immunobiology* 209:681-7.
- 610 27. Gao Y, Han F, Huang X, Rong Y, Yi H, Wang Y. 2013. Changes in gut microbial populations,  
611 intestinal morphology, expression of tight junction proteins, and cytokine production between  
612 two pig breeds after challenge with *Escherichia coli* K88: A comparative study1. *Journal of*  
613 *Animal Science* 91:5614-5625.
- 614 28. Watanabe K, Petri WA, Jr. 2016. Environmental Enteropathy: Elusive but Significant Subclinical  
615 Abnormalities in Developing Countries. *EBioMedicine* 10:25-32.
- 616 29. McCracken BA, Spurlock ME, Roos MA, Zuckermann FA, Gaskins HR. 1999. Weaning anorexia  
617 may contribute to local inflammation in the piglet small intestine. *J Nutr* 129:613-9.
- 618 30. Dou S, Gadonna-Widehem P, Rome V, Hamoudi D, Rhazi L, Lakhil L, Larcher T, Bahi-Jaber N,  
619 Pinon-Quintana A, Guyonvarch A, Huerou-Luron IL, Abdennebi-Najar L. 2017. Characterisation of

- 620 Early-Life Fecal Microbiota in Susceptible and Healthy Pigs to Post-Weaning Diarrhoea. *PLoS One*  
621 12:e0169851.
- 622 31. Chen L, Xu Y, Chen X, Fang C, Zhao L, Chen F. 2017. The Maturing Development of Gut  
623 Microbiota in Commercial Piglets during the Weaning Transition. *Front Microbiol* 8:1688.
- 624 32. Montagne L, Boudry G, Favier C, Le Huerou-Luron I, Lalles JP, Seve B. 2007. Main intestinal  
625 markers associated with the changes in gut architecture and function in piglets after weaning. *Br*  
626 *J Nutr* 97:45-57.
- 627 33. Xia J, Wishart DS. 2016. Using MetaboAnalyst 3.0 for Comprehensive Metabolomics Data  
628 Analysis. *Curr Protoc Bioinformatics* 55:14 10 1-14 10 91.
- 629 34. Wishart DS, Feunang YD, Marcu A, Guo AC, Liang K, Vazquez-Fresno R, Sajed T, Johnson D, Li C,  
630 Karu N, Sayeeda Z, Lo E, Assempour N, Berjanskii M, Singhal S, Arndt D, Liang Y, Badran H, Grant  
631 J, Serra-Cayuela A, Liu Y, Mandal R, Neveu V, Pon A, Knox C, Wilson M, Manach C, Scalbert A.  
632 2018. HMDB 4.0: the human metabolome database for 2018. *Nucleic Acids Res* 46:D608-d617.
- 633 35. Goldansaz SA, Guo AC, Sajed T, Steele MA, Plastow GS, Wishart DS. 2017. Livestock  
634 metabolomics and the livestock metabolome: A systematic review. *PLOS ONE* 12:e0177675.
- 635 36. Fothergill JC, Guest JR. 1977. Catabolism of L-lysine by *Pseudomonas aeruginosa*. *J Gen*  
636 *Microbiol* 99:139-55.
- 637 37. Le Gall G, Noor SO, Ridgway K, Scovell L, Jamieson C, Johnson IT, Colquhoun IJ, Kemsley EK,  
638 Narbad A. 2011. Metabolomics of fecal extracts detects altered metabolic activity of gut  
639 microbiota in ulcerative colitis and irritable bowel syndrome. *J Proteome Res* 10:4208-18.
- 640 38. Jansson J, Willing B, Lucio M, Fekete A, Dicksved J, Halfvarson J, Tysk C, Schmitt-Kopplin P. 2009.  
641 Metabolomics reveals metabolic biomarkers of Crohn's disease. *PLoS One* 4:e6386.
- 642 39. Bjerrum JT, Wang Y, Hao F, Coskun M, Ludwig C, Gunther U, Nielsen OH. 2015. Metabonomics of  
643 human fecal extracts characterize ulcerative colitis, Crohn's disease and healthy individuals.  
644 *Metabolomics* 11:122-133.
- 645 40. Byersdorfer CA. 2014. The role of Fatty Acid oxidation in the metabolic reprogramming of  
646 activated t-cells. *Front Immunol* 5:641.
- 647 41. Namgaladze D, Brune B. 2016. Macrophage fatty acid oxidation and its roles in macrophage  
648 polarization and fatty acid-induced inflammation. *Biochim Biophys Acta* 1861:1796-1807.
- 649 42. Joensen KG, Tetzschner AMM, Iguchi A, Aarestrup FM, Scheutz F. 2015. Rapid and Easy In Silico  
650 Serotyping of *Escherichia coli* Isolates by Use of Whole-Genome Sequencing Data. *Journal of*  
651 *Clinical Microbiology* 53:2410-2426.
- 652 43. EWING WH TH, DAVIS BR. 1958. *Escherichia coli* serotypes associated with edema disease of  
653 swine. *Cornell Vet* 48:201-206.
- 654 44. Mainil J. 2013. *Escherichia coli* virulence factors. *Vet Immunol Immunopathol* 152:2-12.
- 655 45. Moxley RA, Berberov EM, Francis DH, Xing J, Moayeri M, Welch RA, Baker DR, Barletta RG. 1998.  
656 Pathogenicity of an Enterotoxigenic *Escherichia coli* Hemolysin (hlyA) Mutant in Gnotobiotic  
657 Piglets. *Infection and Immunity* 66:5031-5035.
- 658 46. Mirsepasi-Lauridsen HC, Du Z, Struve C, Charbon G, Karczewski J, Krogfelt KA, Petersen AM,  
659 Wells JM. 2016. Secretion of Alpha-Hemolysin by *Escherichia coli* Disrupts Tight Junctions in  
660 Ulcerative Colitis Patients. *Clin Transl Gastroenterol* 7:e149.
- 661 47. Bucker R, Schulz E, Gunzel D, Bojarski C, Lee IF, John LJ, Wiegand S, Janssen T, Wieler LH,  
662 Dobrindt U, Beutin L, Ewers C, Fromm M, Siegmund B, Troeger H, Schulzke JD. 2014. alpha-  
663 Haemolysin of *Escherichia coli* in IBD: a potentiator of inflammatory activity in the colon. *Gut*  
664 63:1893-901.
- 665 48. Moxley RA. 2000. Edema Disease. *Veterinary Clinics of North America: Food Animal Practice*  
666 16:175-185.

- 667 49. Cai Y, Martínez Y, Li Qiang Yao Y, Yu L. 2016. Review of enterotoxigenic *Escherichia coli*  
668 enterotoxins, vol 4, *Acad. J. Microbiol.*
- 669 50. Zhang W, Zhao M, Ruesch L, Omot A, Francis D. 2007. Prevalence of virulence genes in  
670 *Escherichia coli* strains recently isolated from young pigs with diarrhea in the US. *Vet Microbiol*  
671 123:145-52.
- 672 51. Mills M, Payne SM. 1995. Genetics and regulation of heme iron transport in *Shigella dysenteriae*  
673 and detection of an analogous system in *Escherichia coli* O157:H7. *Journal of Bacteriology*  
674 177:3004-3009.
- 675 52. Field M. 2003. Intestinal ion transport and the pathophysiology of diarrhea. *Journal of Clinical*  
676 *Investigation* 111:931-943.
- 677 53. Guan Q. 2019. A Comprehensive Review and Update on the Pathogenesis of Inflammatory  
678 Bowel Disease. *Journal of immunology research* 2019:7247238-7247238.
- 679 54. Walana W, Ye Y, Li M, Wang J, Wang B, Cheng J-w, Gordon JR, Li F. 2018. IL-8 antagonist,  
680 CXCL8(3-72)K11R/G31P coupled with probiotic exhibit variably enhanced therapeutic potential  
681 in ameliorating ulcerative colitis. *Biomedicine & Pharmacotherapy* 103:253-261.
- 682 55. Bankevich A, Nurk S, Antipov D, Gurevich AA, Dvorkin M, Kulikov AS, Lesin VM, Nikolenko SI,  
683 Pham S, Pribelski AD, Pyshkin AV, Sirotkin AV, Vyahhi N, Tesler G, Alekseyev MA, Pevzner PA.  
684 2012. SPAdes: A New Genome Assembly Algorithm and Its Applications to Single-Cell  
685 Sequencing. *Journal of Computational Biology* 19:455-477.
- 686 56. Tatusova T, DiCuccio M, Badretdin A, Chetvernin V, Nawrocki EP, Zaslavsky L, Lomsadze A, Pruitt  
687 KD, Borodovsky M, Ostell J. 2016. NCBI prokaryotic genome annotation pipeline. *Nucleic Acids*  
688 *Research* 44:6614-6624.
- 689 57. Chen L, Zheng D, Liu B, Yang J, Jin Q. 2016. VFDB 2016: hierarchical and refined dataset for big  
690 data analysis—10 years on. *Nucleic Acids Research* 44:D694-D697.
- 691 58. Camacho C, Coulouris G, Avagyan V, Ma N, Papadopoulos J, Bealer K, Madden TL. 2009. BLAST+:  
692 architecture and applications. *BMC Bioinformatics* 10:421.
- 693 59. Finn RD, Attwood TK, Babbitt PC, Bateman A, Bork P, Bridge AJ, Chang H-Y, Dosztányi Z, El-Gebali  
694 S, Fraser M, Gough J, Haft D, Holliday GL, Huang H, Huang X, Letunic I, Lopez R, Lu S, Marchler-  
695 Bauer A, Mi H, Mistry J, Natale DA, Necci M, Nuka G, Orengo CA, Park Y, Pesseat S, Piovesan D,  
696 Potter SC, Rawlings ND, Redaschi N, Richardson L, Rivoire C, Sangrador-Vegas A, Sigrist C, Sillitoe  
697 I, Smithers B, Squizzato S, Sutton G, Thanki N, Thomas PD, Tosatto Silvio C E, Wu CH, Xenarios I,  
698 Yeh L-S, Young S-Y, Mitchell AL. 2017. InterPro in 2017—beyond protein family and domain  
699 annotations. *Nucleic Acids Research* 45:D190-D199.
- 700 60. PETER K. FAGAN MAH, KARL A. BETTELHEIM,, DJORDJEVIC SP. 1999. Detection of Shiga-Like  
701 Toxin (stx1 and stx2), Intimin (eaeA), and Enterohemorrhagic *Escherichia coli* (EHEC) Hemolysin  
702 (EHEC hlyA) Genes in Animal Feces by Multiplex PCR. *APPLIED AND ENVIRONMENTAL*  
703 *MICROBIOLOGY* 65:868-872.
- 704 61. Osek J. 2001. Multiplex polymerase chain reaction assay for identification of enterotoxigenic  
705 *Escherichia coli* strains. *J Vet Diagn Invest* 13:308-311.
- 706 62. Blick AK, Giaretta PR, Sprayberry S, Bush-Vadala C, Paulk CB, Boeckman J, Callaway TR, Gill JJ,  
707 Rech RR. 2019. Comparison of 2 fixatives in the porcine colon for in situ microbiota studies.  
708 *Journal of Animal Science* 97:4803-4809.
- 709 63. Fiehn O, Wohlgemuth G, Scholz M, Kind T, Lee DY, Lu Y, Moon S, Nikolau B. 2008. Quality control  
710 for plant metabolomics: reporting MSI-compliant studies. *Plant J* 53:691-704.
- 711 64. Sud M, Fahy E, Cotter D, Azam K, Vadivelu I, Burant C, Edison A, Fiehn O, Higashi R, Nair KS,  
712 Sumner S, Subramaniam S. 2016. Metabolomics Workbench: An international repository for

713 metabolomics data and metadata, metabolite standards, protocols, tutorials and training, and  
714 analysis tools. *Nucleic Acids Res* 44:D463-70.  
715 65. Suchodolski JS, Markel ME, Garcia-Mazcorro JF, Unterer S, Heilmann RM, Dowd SE, Kachroo P,  
716 Ivanov I, Minamoto Y, Dillman EM, Steiner JM, Cook AK, Toresson L. 2012. The fecal microbiome  
717 in dogs with acute diarrhea and idiopathic inflammatory bowel disease. *PLoS One* 7:e51907.  
718 66. Walter J, Hertel C, Tannock GW, Lis CM, Munro K, Hammes WP. 2001. Detection of  
719 *Lactobacillus*, *Pediococcus*, *Leuconostoc*, and *Weissella* species in human feces by using group-  
720 specific PCR primers and denaturing gradient gel electrophoresis. *Appl Environ Microbiol*  
721 67:2578-85.

722

723

## 724 **Supporting Information**

725 **S1 Table. Metabolites identified by volcano plot**

726 **S2 Table. *E. coli* 62-57nal virulence genes**

727 **S3Table. Diet composition (as-fed basis)**

## 728 **Figures and Table Captions**

| <b>Table 1. Effects of ETEC 23545 treatment on nursery pig performance</b> |                  |              |                |            |                            |
|----------------------------------------------------------------------------|------------------|--------------|----------------|------------|----------------------------|
|                                                                            | <b>Treatment</b> |              |                |            |                            |
| <b>Item</b>                                                                | <b>Control</b>   | <b>Acute</b> | <b>Chronic</b> | <b>SEM</b> | <b>Probability, P &lt;</b> |
| <b>d 0 to 6</b>                                                            |                  |              |                |            |                            |
| <b>ADG, g</b>                                                              | 263              | 119          | 225            | 55.93      | 0.224                      |
| <b>ADFI, g</b>                                                             | 179              | 210          | 232            | 43.05      | 0.688                      |
| <b>G:F</b>                                                                 | 2.02             | 0.66         | 0.89           | 0.722      | 0.184                      |

729 A total of 24 weaned barrows (initial BW approximately 14 lb; Landrace × Large White) were  
730 used in a 7 d study. Pigs were housed 2 pigs per pen with a total of 4 pens per treatment.  
731 Treatments refer to the following: Control= Pigs administered a sham challenge of PBS each  
732 day, Acute = pigs administered approximately 10<sup>9</sup> CFU of *E. coli* 62-57nal on d 1 then sham

733 challenged for the remaining time, Chronic = pigs administered approximately  $10^7$  CFU of *E.*

734 *coli* 62-57nal from d 1 to d 6.

735

736

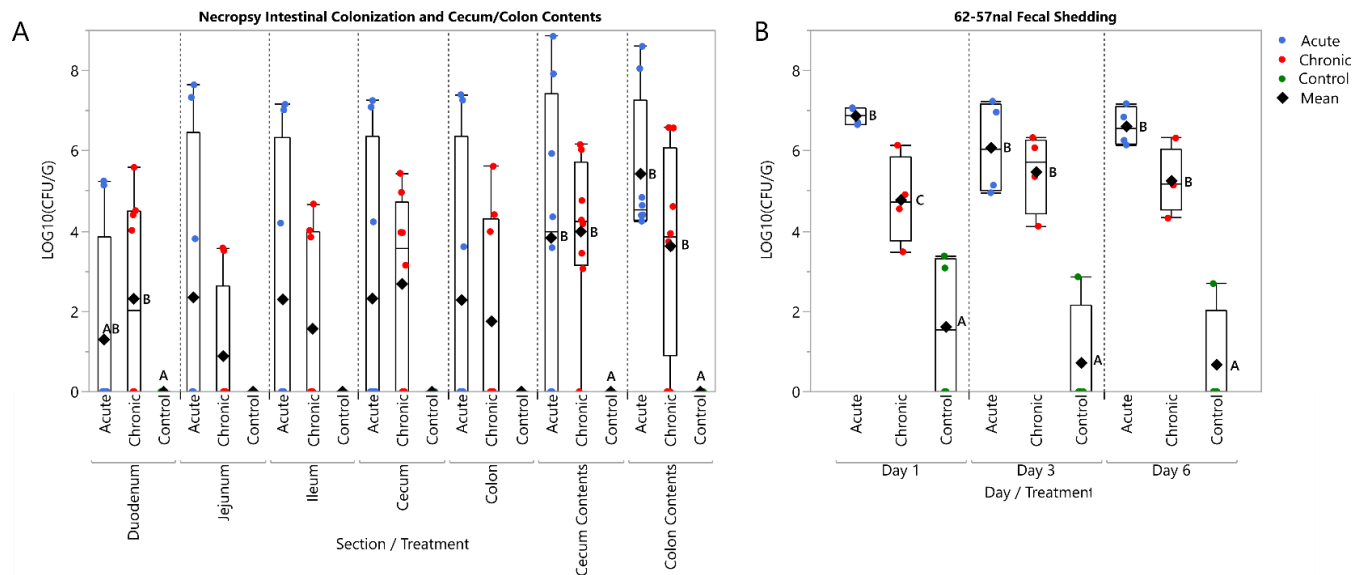

737

738 **Fig 1. Acute and chronic regimens are sufficient to cause colonization of *E. coli* 62-57nal.**

739 **(A.)** At time of necropsy, intestinal scrapings from the duodenum, jejunum, ileum, cecum, and

740 colon were collected and plated for bacterial enumeration. Additionally, cecum and colon

741 contents were collected for direct plating. **(B.)** Fecal samples were collected from each pen on

742 day 1,3, and 6. These samples were serial diluted and plated for direct enumeration of bacteria.

743  $\text{LOD} \sim 5 \times 10^2$  CFU/G. **Both (A.) and (B.)** Circles indicate sampling data points, diamonds

744 indicate mean. Sample data was transformed using  $\text{LOG}_{10}$ . Treatment means grouped by

745 day/section with different letters were significantly different ( $P < .05$ )

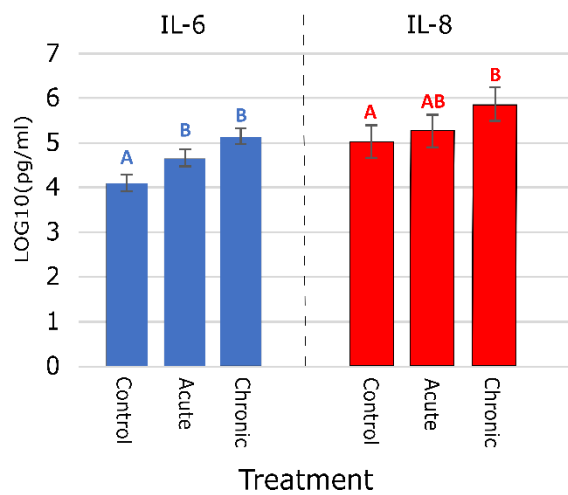

746

747 **Fig 2. Effect on Serum Cytokines IL-8 and IL-6.** On day 6, serum samples were taken from  
748 each piglet. Samples were tested by ELISA and data was transformed using Log10. Means with  
749 different letters within each cytokine differ significantly ( $P < 0.05$ ). Error bars represent SEM.

| Bacterial Groups that change from Control at Day 1 |                            | Bacterial Groups that change from Control at Day 3 |                                | Bacterial Groups that change from Control at Day 6 |         | Bacterial Groups that change at Day 6 from their corresponding pretreatment sample at Day -1 |                              |                            |
|----------------------------------------------------|----------------------------|----------------------------------------------------|--------------------------------|----------------------------------------------------|---------|----------------------------------------------------------------------------------------------|------------------------------|----------------------------|
| Acute                                              | Chronic                    | Acute                                              | Chronic                        | Acute                                              | Chronic | Acute                                                                                        | Chronic                      | Control                    |
| Fusobacterium*<br>▼(.0571)                         | Fusobacterium*<br>▼(.0571) | E. coli**<br>▲(.0286)                              | Faecalibacterium**<br>▲(.0286) | Fusobacterium**<br>▲(.0286)                        |         | Bacteroidetes**<br>▲(.0286)                                                                  | Bacteroidetes**<br>▲(.0143)  | Enterococcus**<br>▲(.0286) |
|                                                    | Enterococcus*<br>▼(.0571)  | Streptococcus**<br>▲(.0286)                        | Universal**<br>▲(.0286)        | Ruminococcaceae**<br>▲(.0143)                      |         | Enterococcus**<br>▲(.0286)                                                                   | Enterococcus**<br>▲(.0143)   | E. coli*<br>▲(.0571)       |
|                                                    | E. coli*<br>▲(.0571)       |                                                    | Firmicutes*<br>▲(.0571)        | Faecalibacterium*<br>▲(.0571)                      |         | Faecalibacterium**<br>▲(.0286)                                                               | Lactobacillus**<br>▲(.0143)  |                            |
|                                                    |                            |                                                    | Bacteroides*<br>▲(.0571)       | E. coli*<br>▲(.0571)                               |         | Lactobacillus**<br>▲(.0286)                                                                  | Streptococcus**<br>▲(.0286)  |                            |
|                                                    |                            |                                                    | Lactobacillus*<br>▲(.0571)     |                                                    |         | Firmicutes**<br>▲(.0286)                                                                     | E. coli*<br>▲(.0571)         |                            |
|                                                    |                            |                                                    | E. coli*<br>▲(.0571)           |                                                    |         | Universal**<br>▲(.0286)                                                                      | Ruminococcaceae*<br>▼(.0571) |                            |
|                                                    |                            |                                                    |                                |                                                    |         | Streptococcus*<br>▲(.0571)                                                                   |                              |                            |
|                                                    |                            |                                                    |                                |                                                    |         | Fusobacterium*<br>▲(.0571)                                                                   |                              |                            |

750

751 **Table 2. qPCR Summary Table** LOGSQ treatment mean compared to Control at each time point (Left) and LOGSQ treatment mean at day 6  
752 compared to its corresponding pretreatment sample at Day-1 (Right). Non-parametric Wilcoxon exact test performed on LOGSQ. Only those  
753 significant or marginally significant listed here, significant defined at  $p < .05$  and marginally significant at  $p < .10$ . (▲) or (▼) indicate mean LOGSQ  
754 are greater than or less than relative to control or Pretreatment. Significant\*\* Marginally Significant\*

755

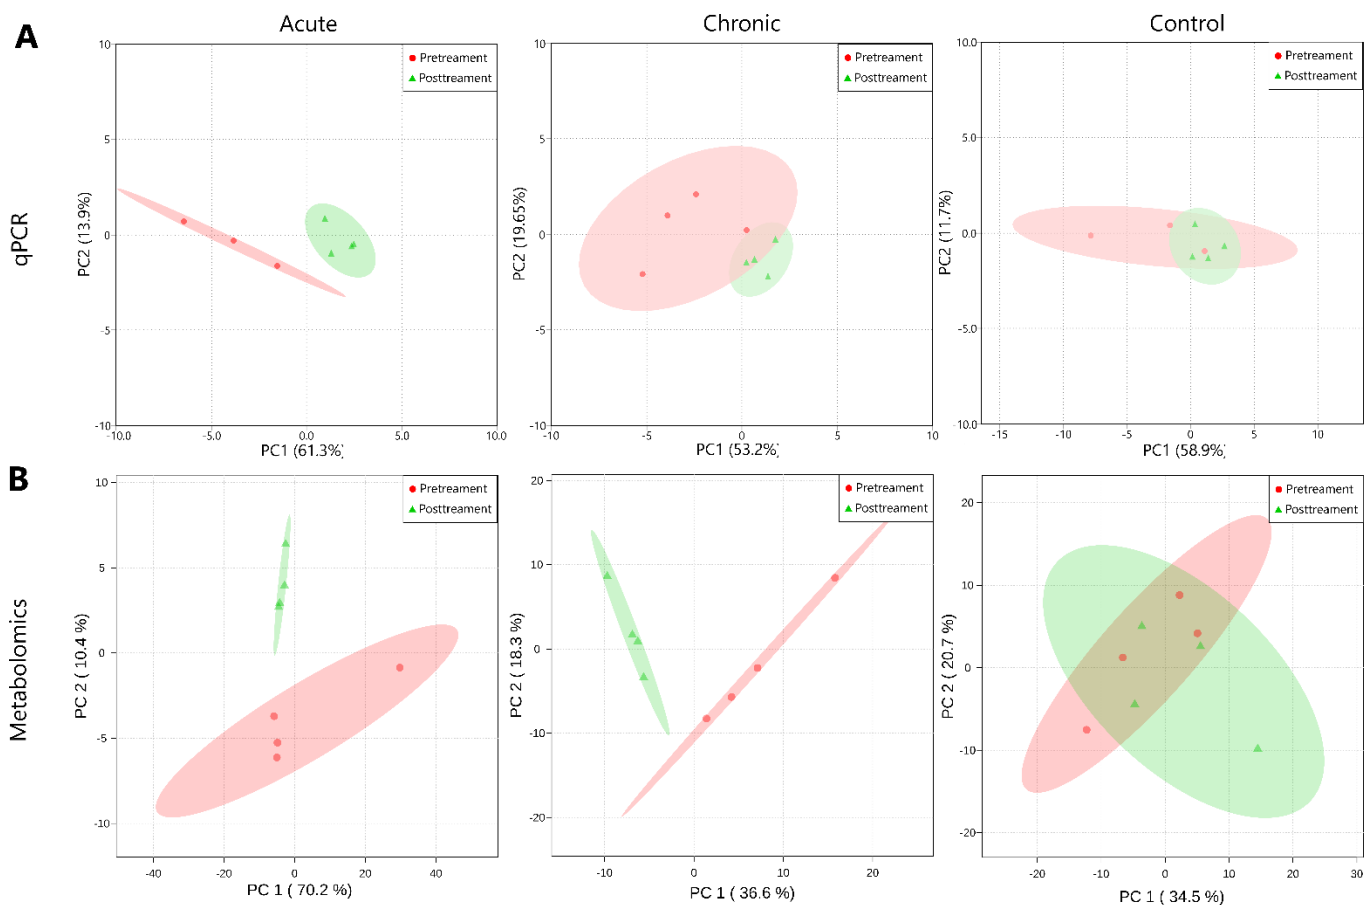

756

757

**Fig 3. Clustering of treatments by principal component analysis (PCA) of metagenomic and metabolomic**

758

**results.** By the end of the trial period, both chronic and acute treatments are able to be separated from their

759

respective pretreatment samples using qPCR and metabolomic data while the control group remains relatively

760

constant. (A.) PCA comparing pre-treatment and post-treatment samples using 16S qPCR of major bacterial

761

taxonomic groups. Red dots indicate pre-treatment samples, green diamonds indicate post-treatment samples,

762

and green/red ellipses represent 95% confidence regions. (B.) PCA comparing pre-treatment and post-treatment

763

samples using identifiable fecal metabolites.

764

765

766

767

768



769

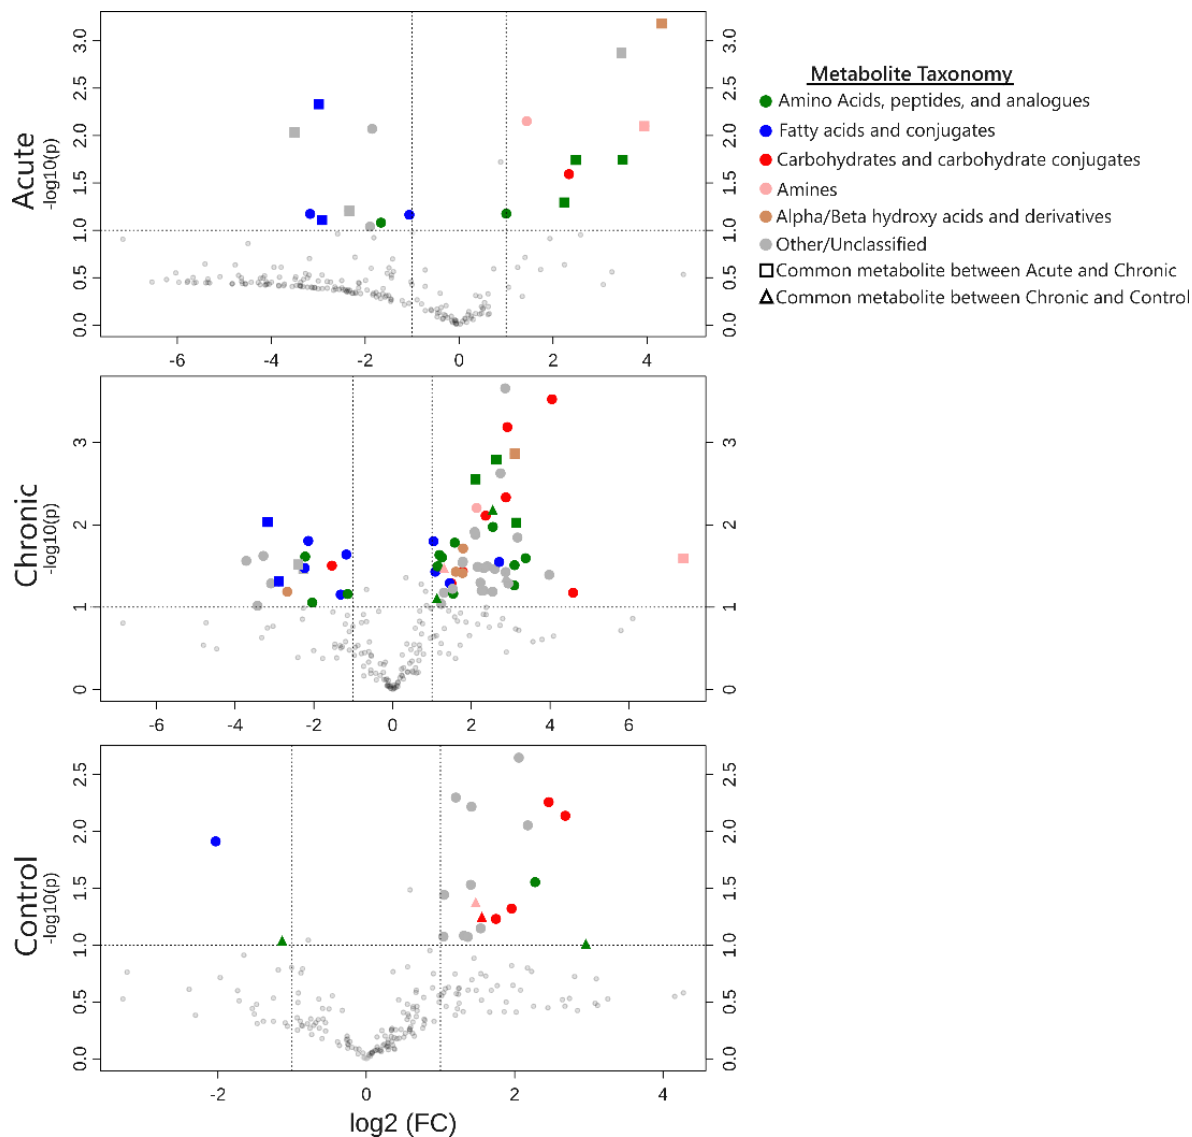

770

771

772

773

774

775

776

777

778

779

780

**Fig 4. Volcano plots comparing changes in identifiable metabolite profiles in pre- and post- treatment fecal samples.** Figures show metabolites that significantly changed from day -1 to day 6 within each STEC dosing regimen. Points represent individual metabolites, which are color-coded based on the Human Metabolomics Database chemical taxonomy (34). Dotted lines indicate significance cutoffs of  $p$ -value  $< 0.1$  (Y-axis) and  $> 2$  fold change in abundance (X-axis); points in the upper left and right quadrants of each graph represent metabolites with significant,  $> 2$ -fold changes from pre- to post-treatment. Point shape indicates if a metabolite is shared by the acute and chronic treatments (squares) or chronic and control treatments (triangles); circular points indicate metabolites that were either not detected or had non-significant changes in other treatments. Both of the STEC-treated groups exhibited elevated levels of metabolites associated with amino acids and reduced metabolites associated with fatty acids compared to the control group.
